# Supplementary material
Source: PubMed Central journal article supplement (PMC10839315)
Supplement: ajcr0014-0097-f8.pdf [file ajcr0014-0097-f8.pdf]

# CTSC expression and NSCLC progression

A

Figure 2D

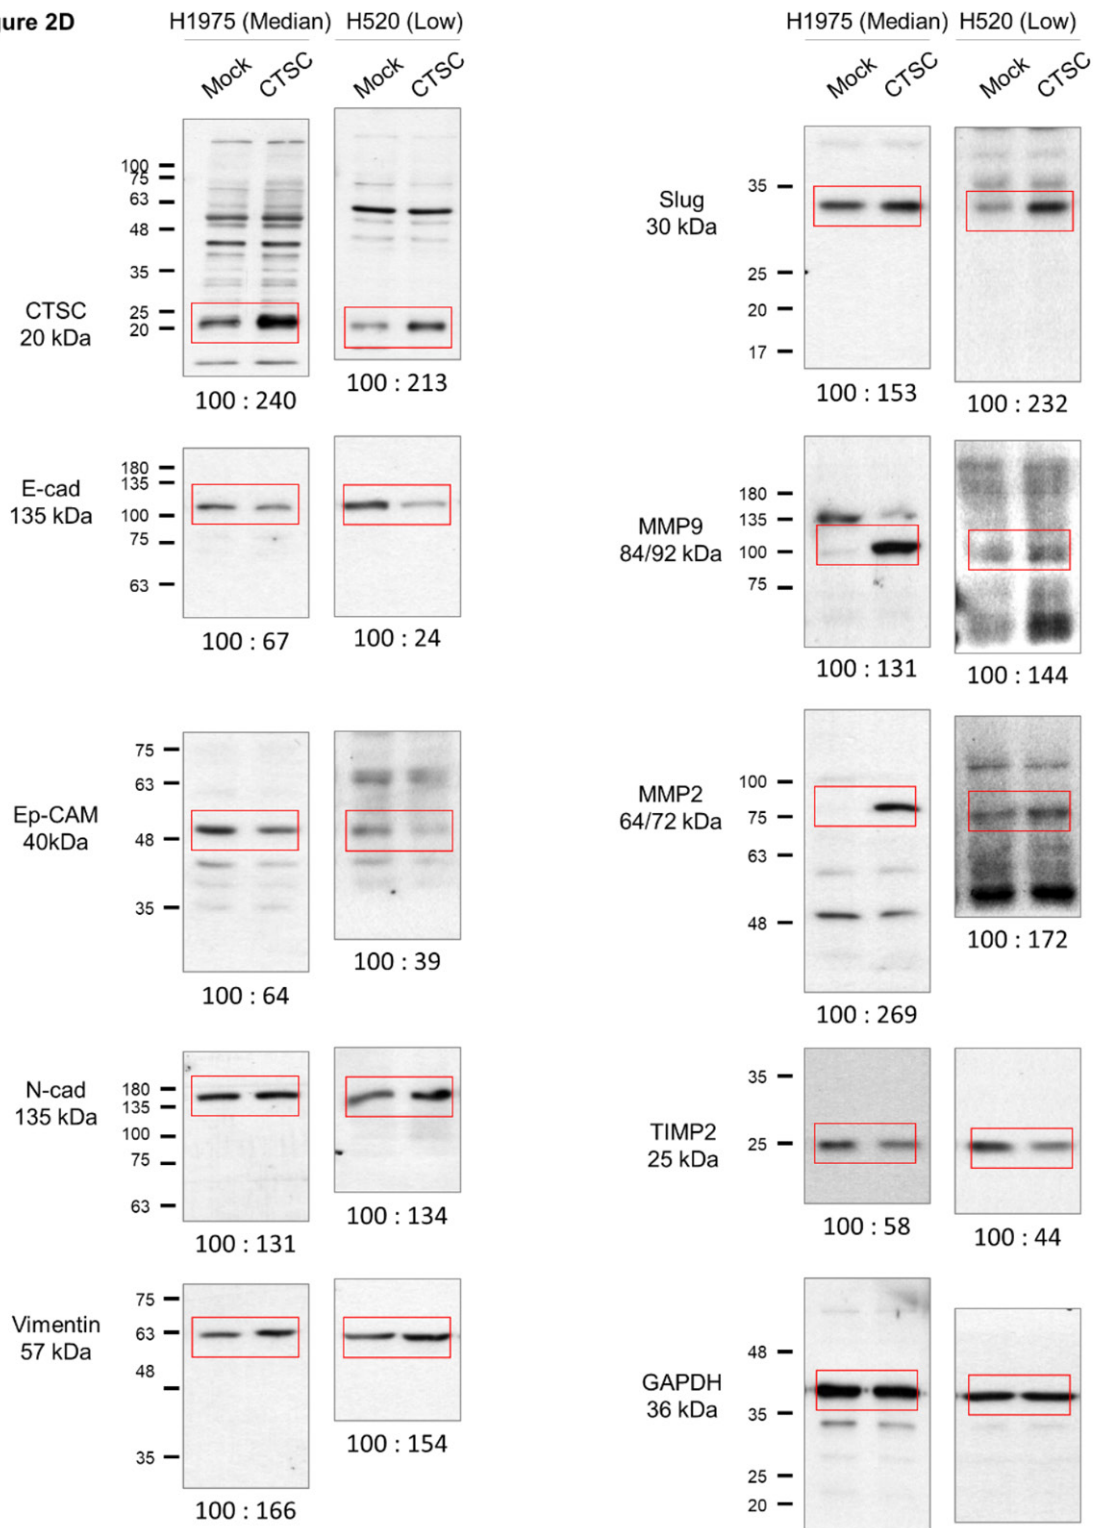

# CTSC expression and NSCLC progression

B

**Figure 2E**

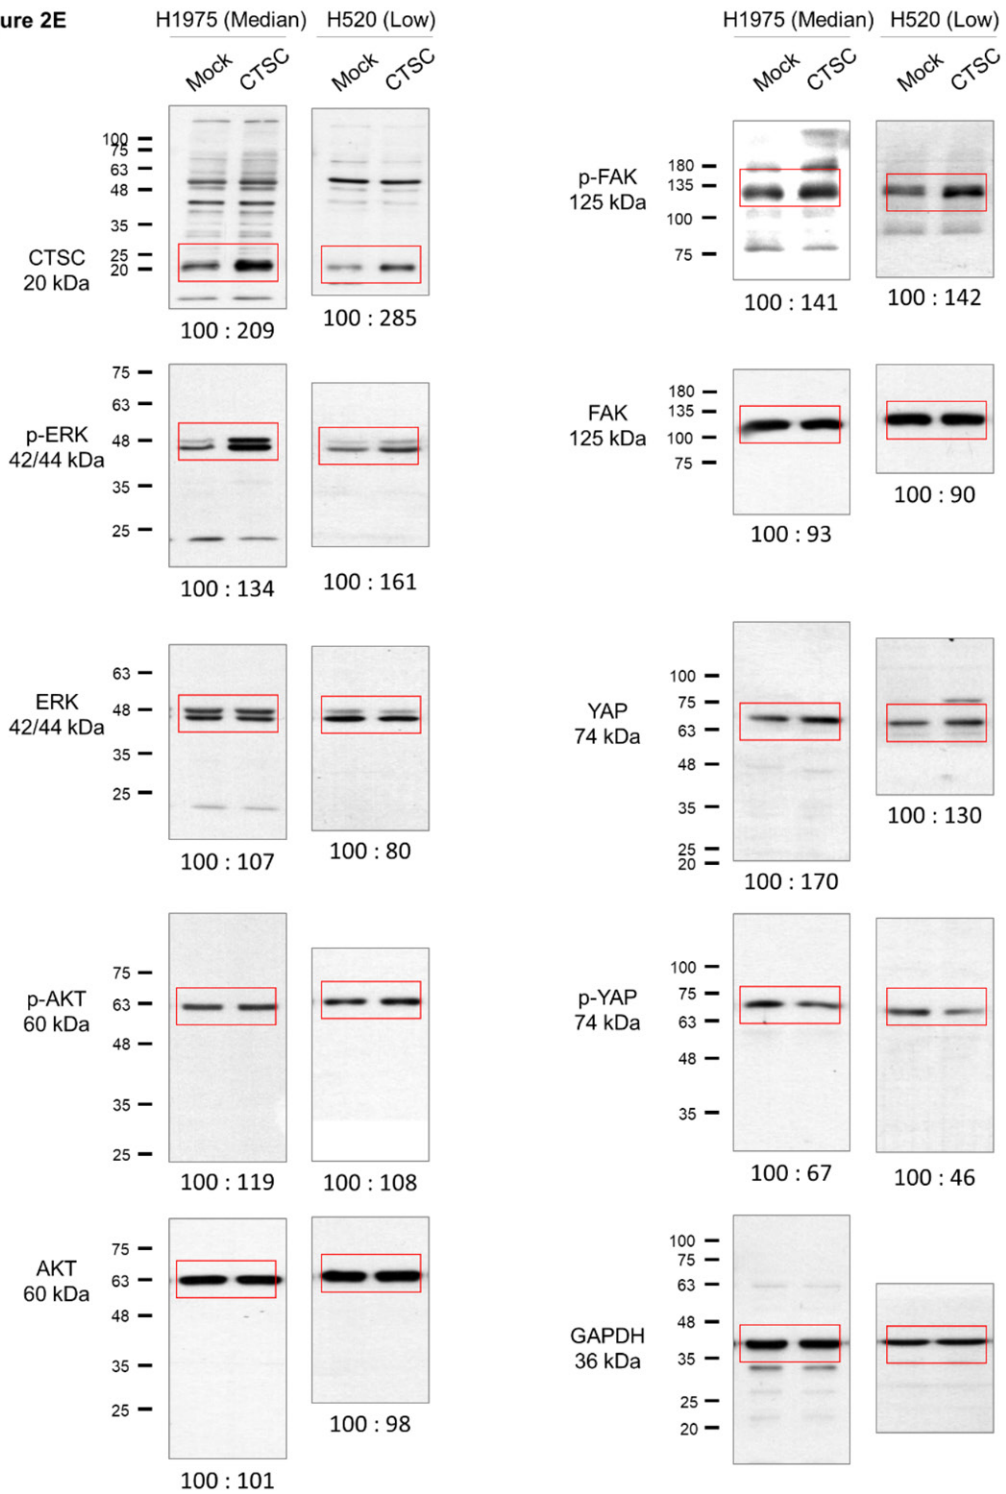

# CTSC expression and NSCLC progression

C

Figure 3A

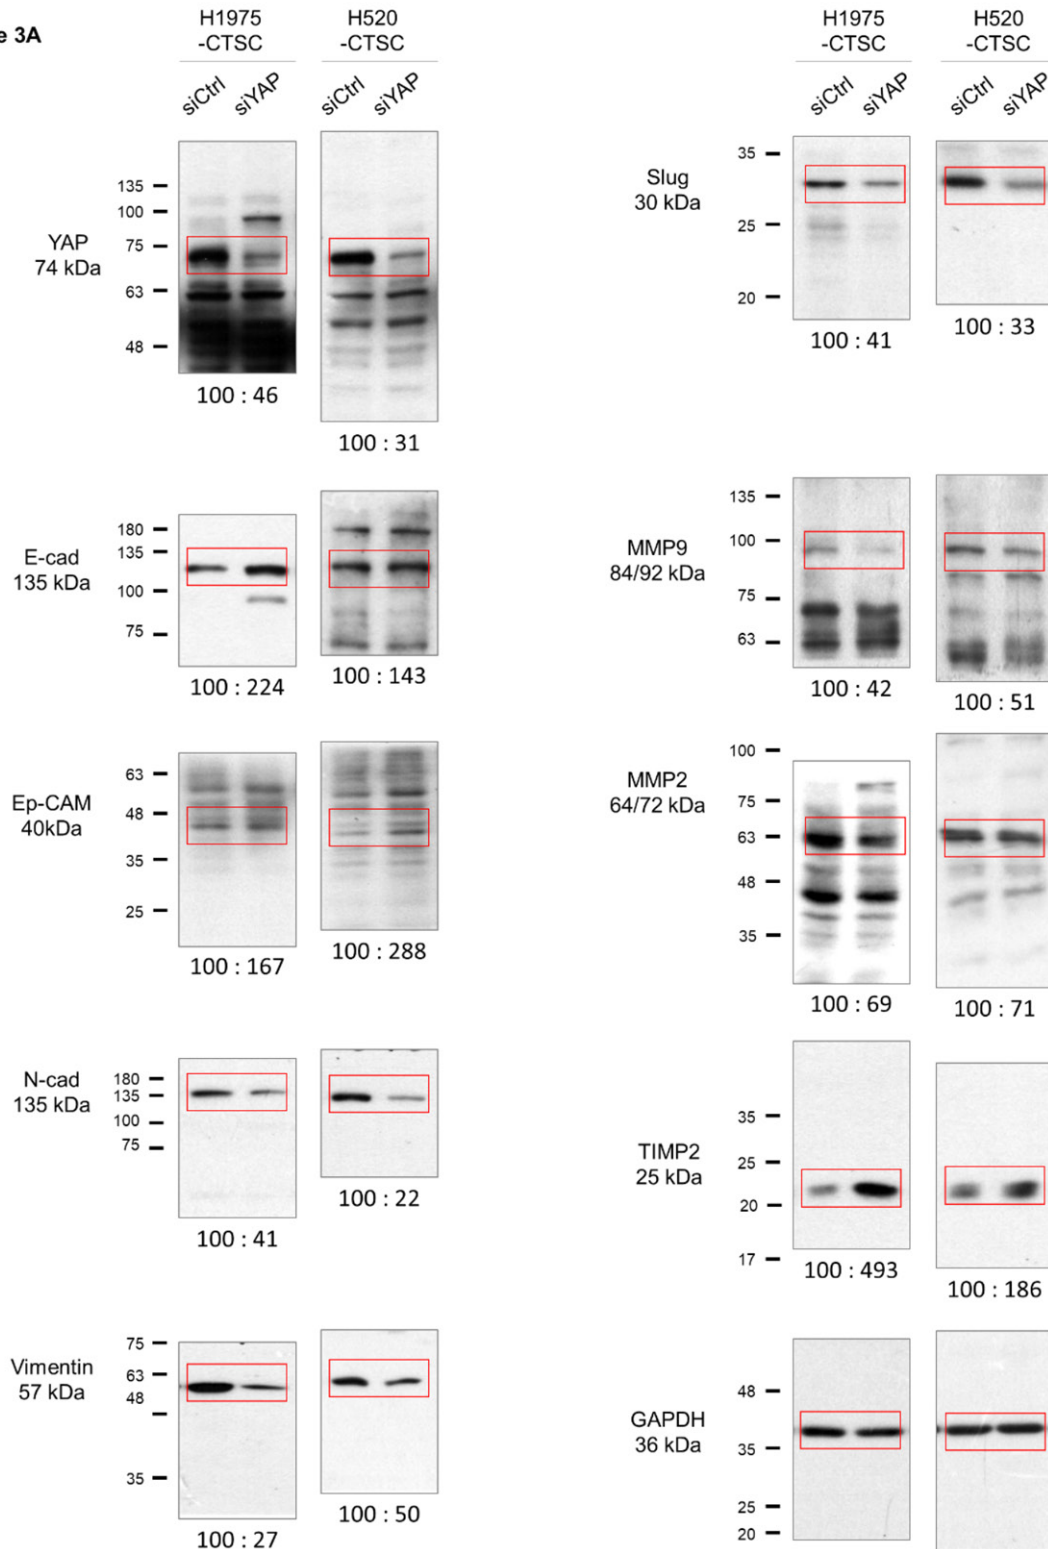

# CTSC expression and NSCLC progression

D

**Figure 4E**

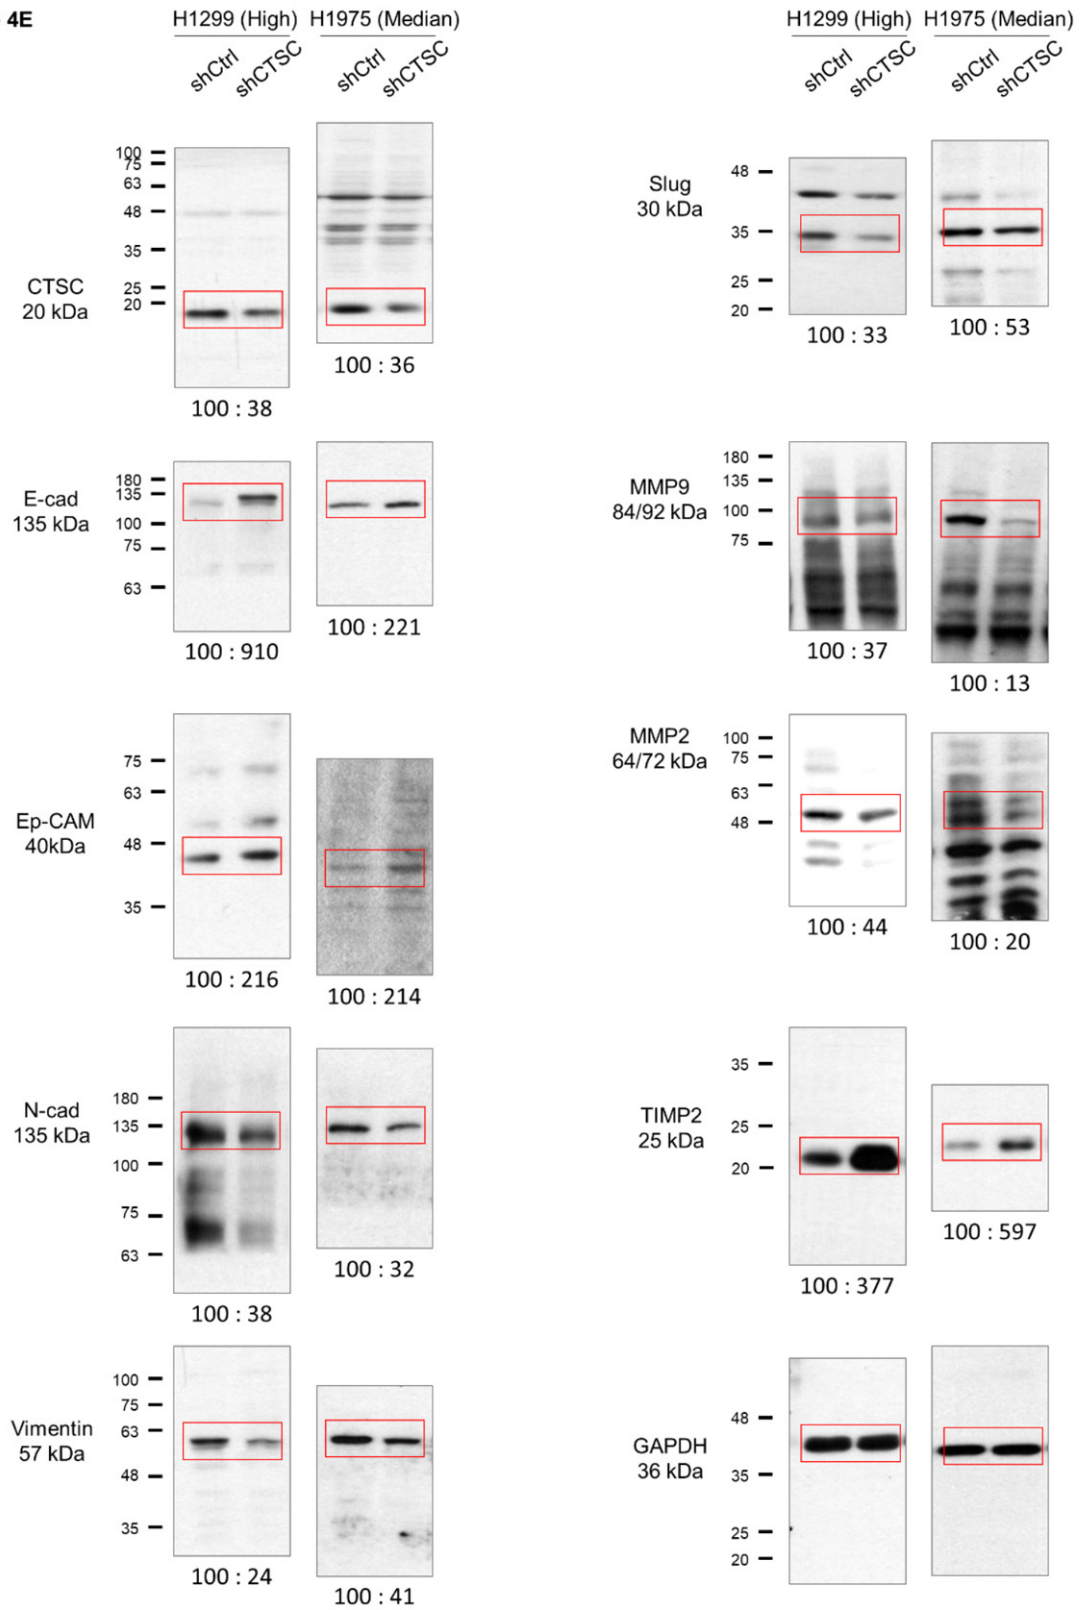

CTSC expression and NSCLC progression

E

Figure 4F

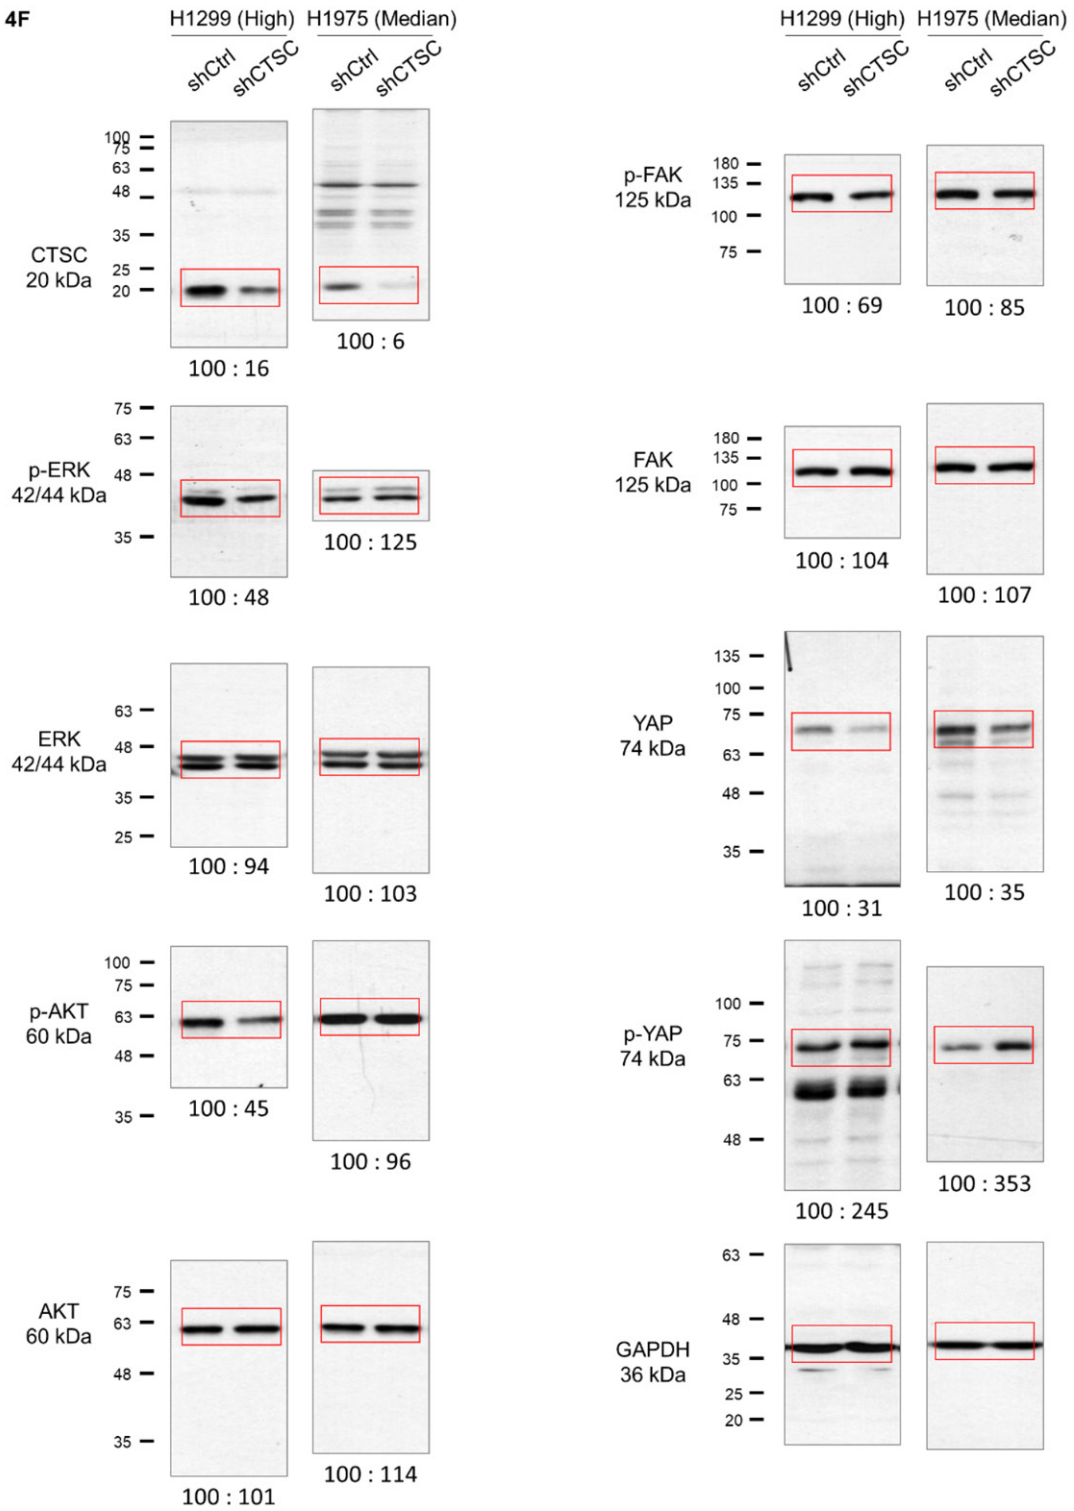

# CTSC expression and NSCLC progression

F

Figure 5B

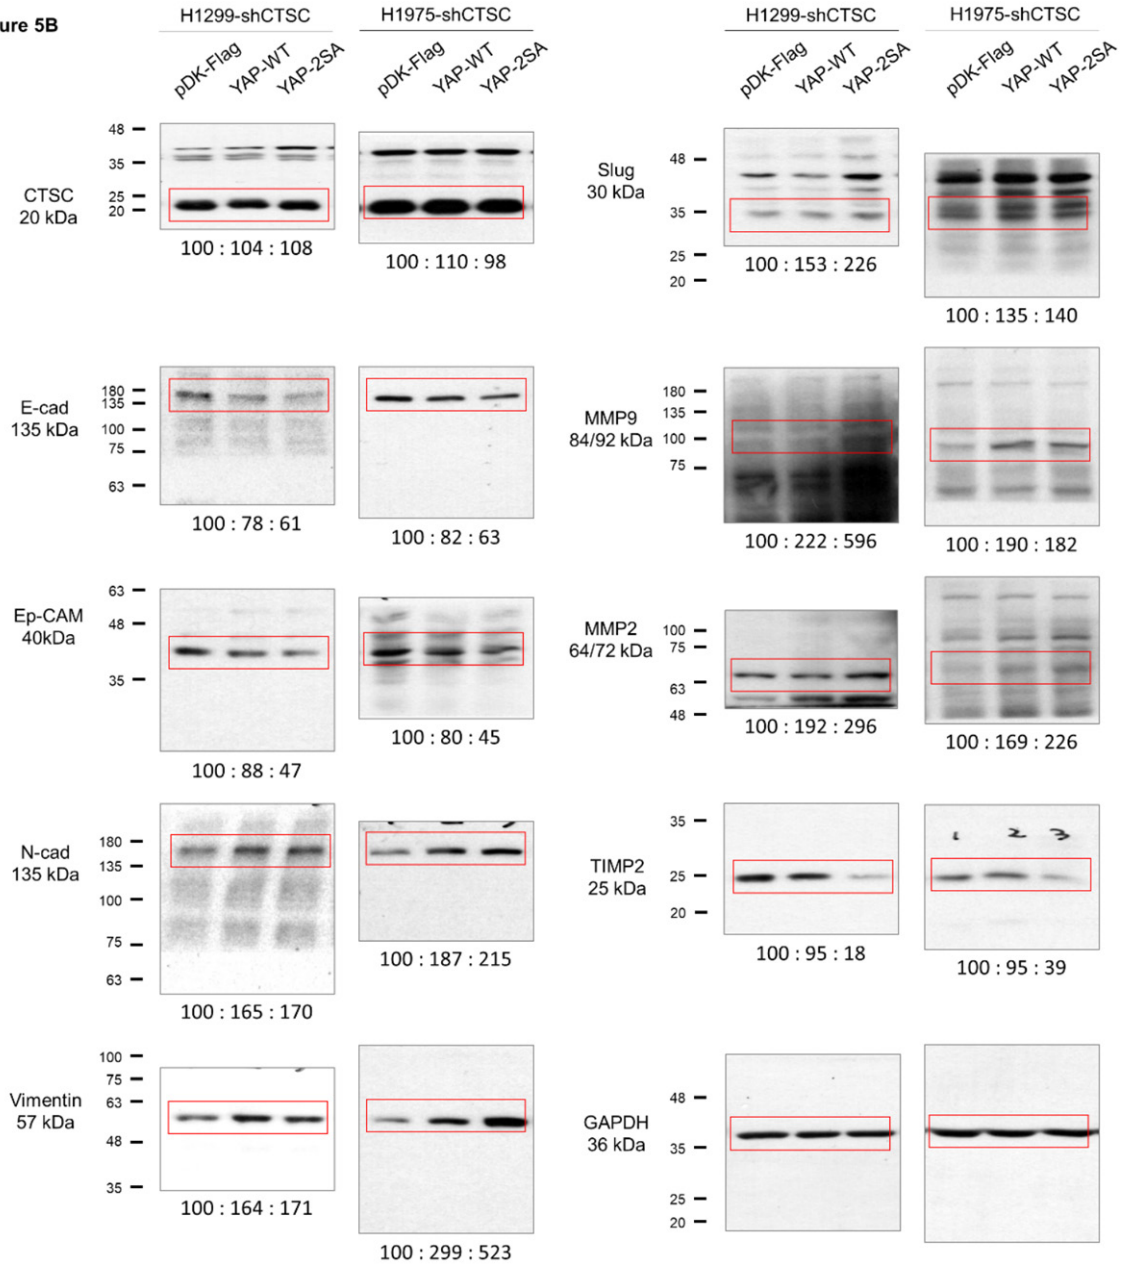

Supplementary Figure 1. Full-length western blots for Figures 2D, 2E, 3A, 4E, 4F, 5B.

## CTSC expression and NSCLC progression

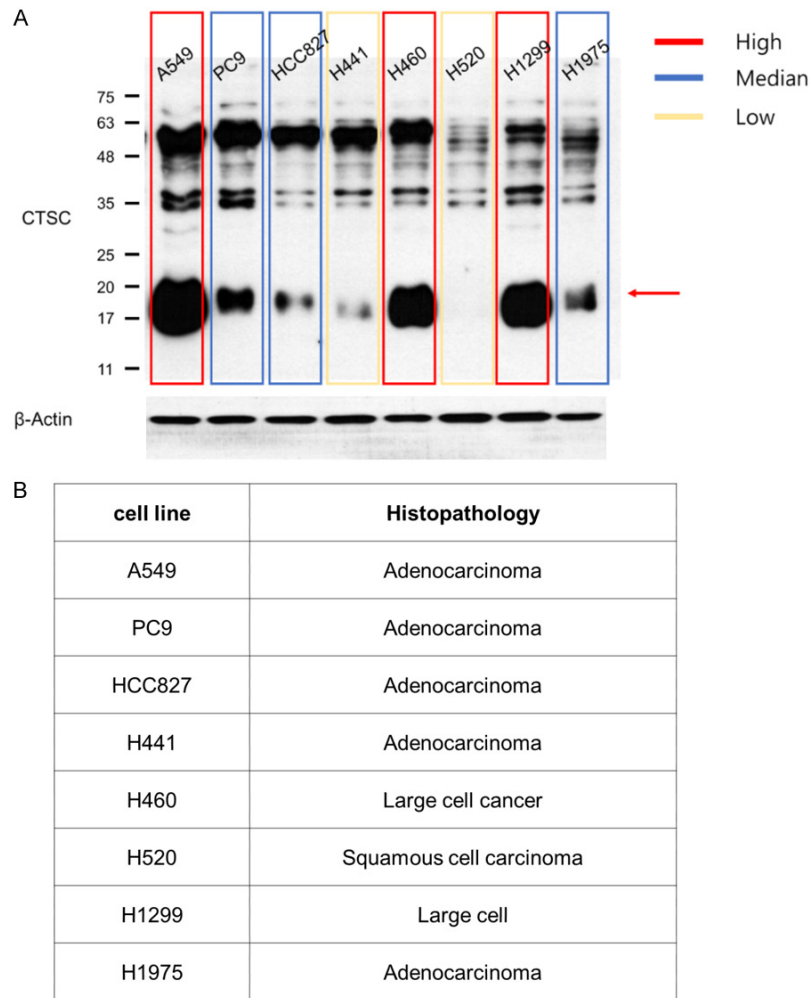

**Supplementary Figure 2.** Protein levels of CTSC in NSCLC cell lines. A. Western blot analysis of CTSC in NSCLC cell lines. CTSC is highly expressed in A549, H460, and H1299 cells; moderately expressed in PC9, HCC827, and H1975 cells; and lowly expressed in H441 and H520 cells. B. Histopathology status in NSCLC cell lines.

CTSC expression and NSCLC progression

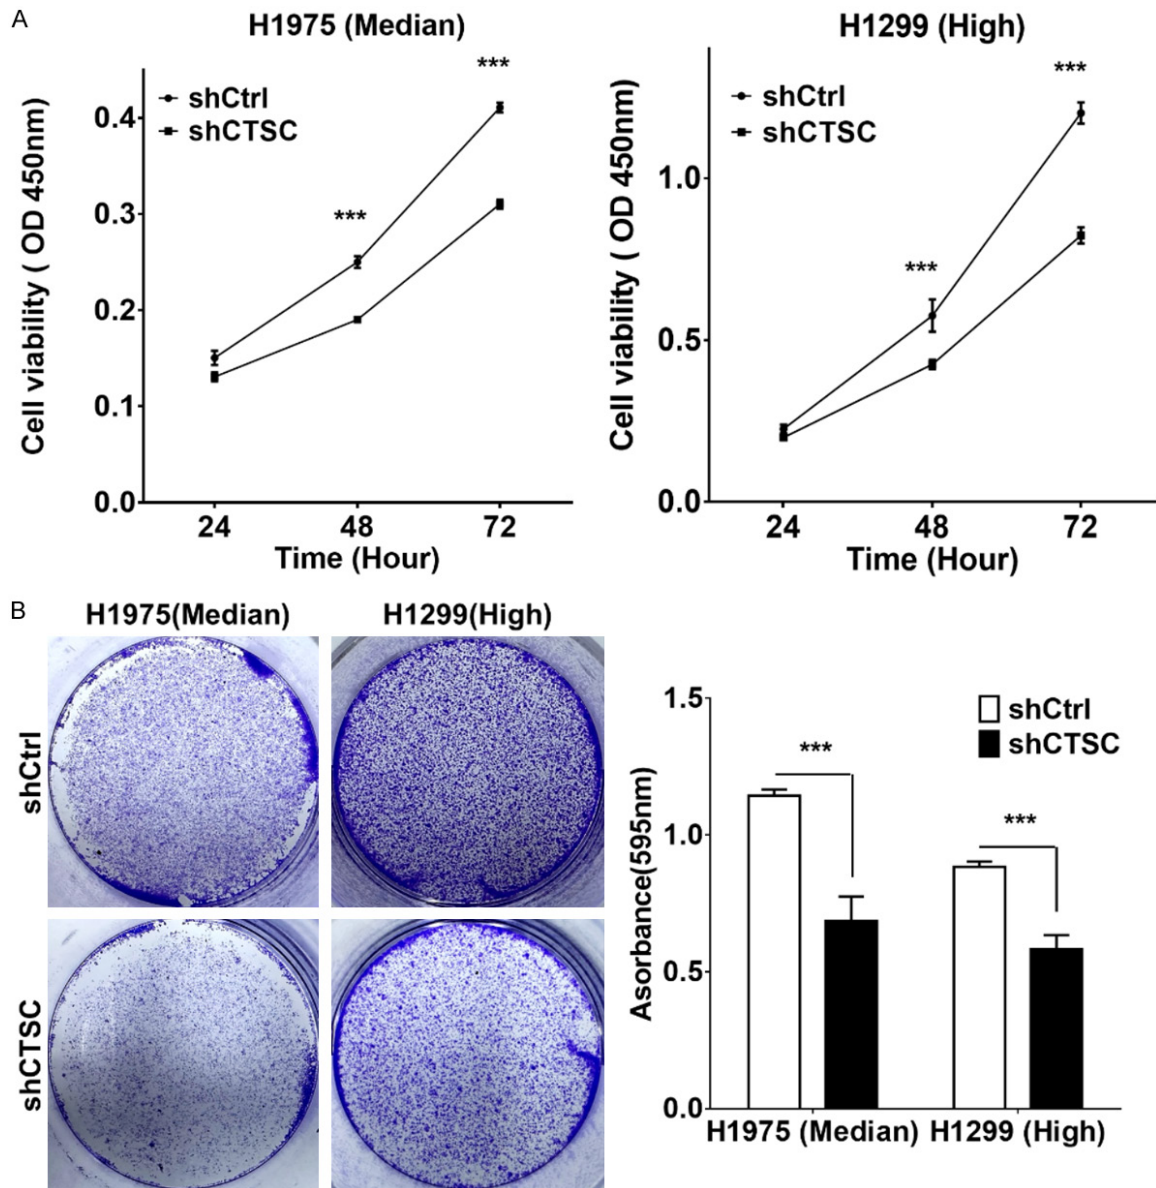

**Supplementary Figure 3.** CTSC knockdown suppresses cell proliferation and colony formation. A. Cell proliferation rates by CCK-8 assay in shCtrl and CTSC knockdown cells. Data are presented as the means  $\pm$  standard deviation and are analyzed using Student's t-test ( $n = 5$ ). B. The clonogenic assay is performed on a six-well culture plate. Crystal violet-stained cells are dissolved in 70% alcohol, and absorbance at 595 nm is measured using a spectrophotometer. The data are presented as the mean  $\pm$  standard deviation and are analyzed using Student's t-test ( $n = 9$ ).



## CTSC expression and NSCLC progression

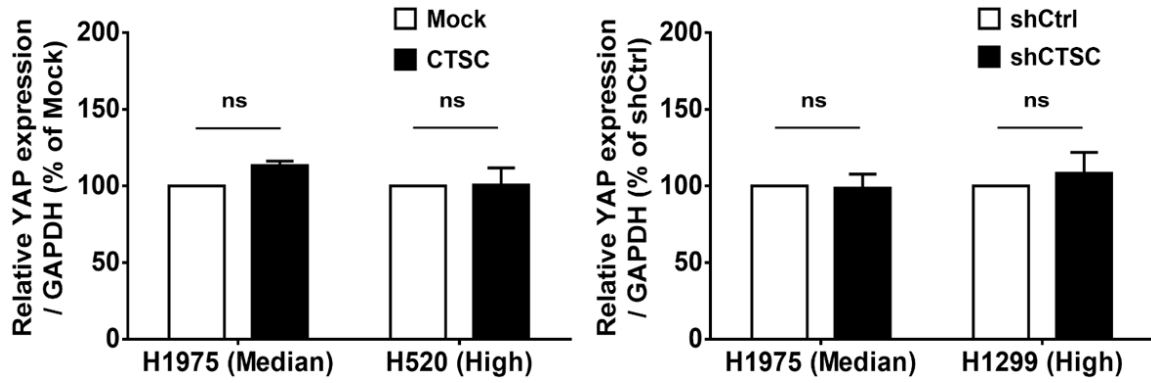

**Supplementary Figure 4.** YAP mRNA level was analyzed in CTSC overexpression or CTSC knockdown cells. The data are presented as the mean  $\pm$  standard deviation and are analyzed using Student's t-test (n = 4).

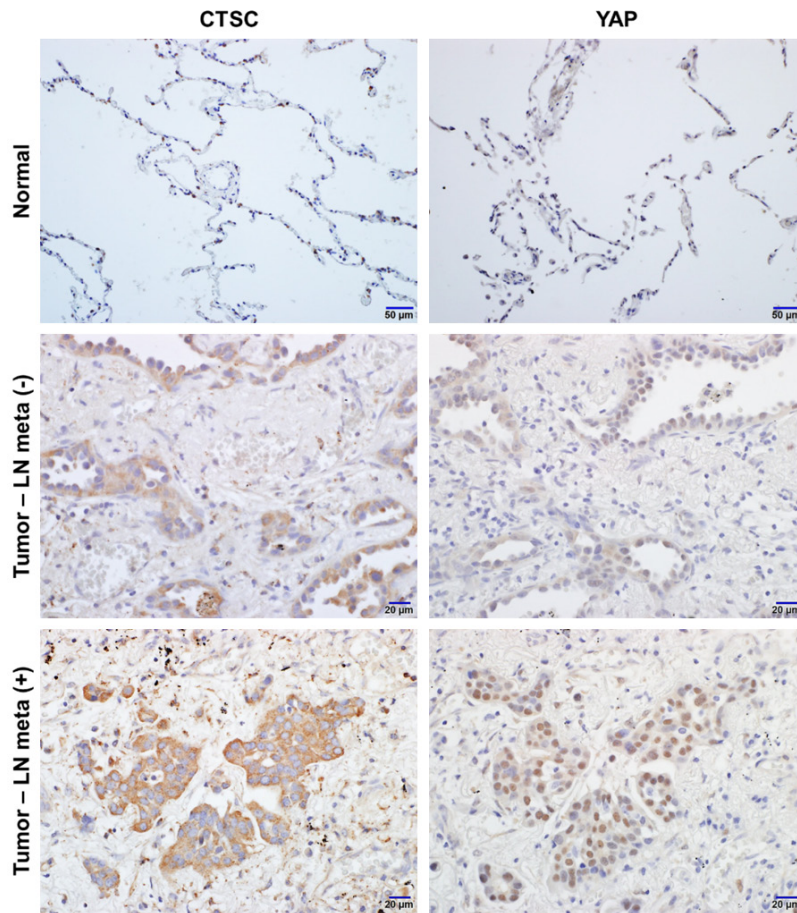

**Supplementary Figure 5.** CTSC and YAP are co-overexpressed in lung adenocarcinoma. Expression of CTSC and YAP protein in lung adenocarcinoma tissues. Lung adenocarcinoma tissues are immunohistochemically stained with an anti-CTSC and anti-YAP antibody. The panels show normal tissues, tumor without lymph node metastasis, and tumor with lymph node metastasis. Magnification:  $\times$  400.

# CTSC expression and NSCLC progression

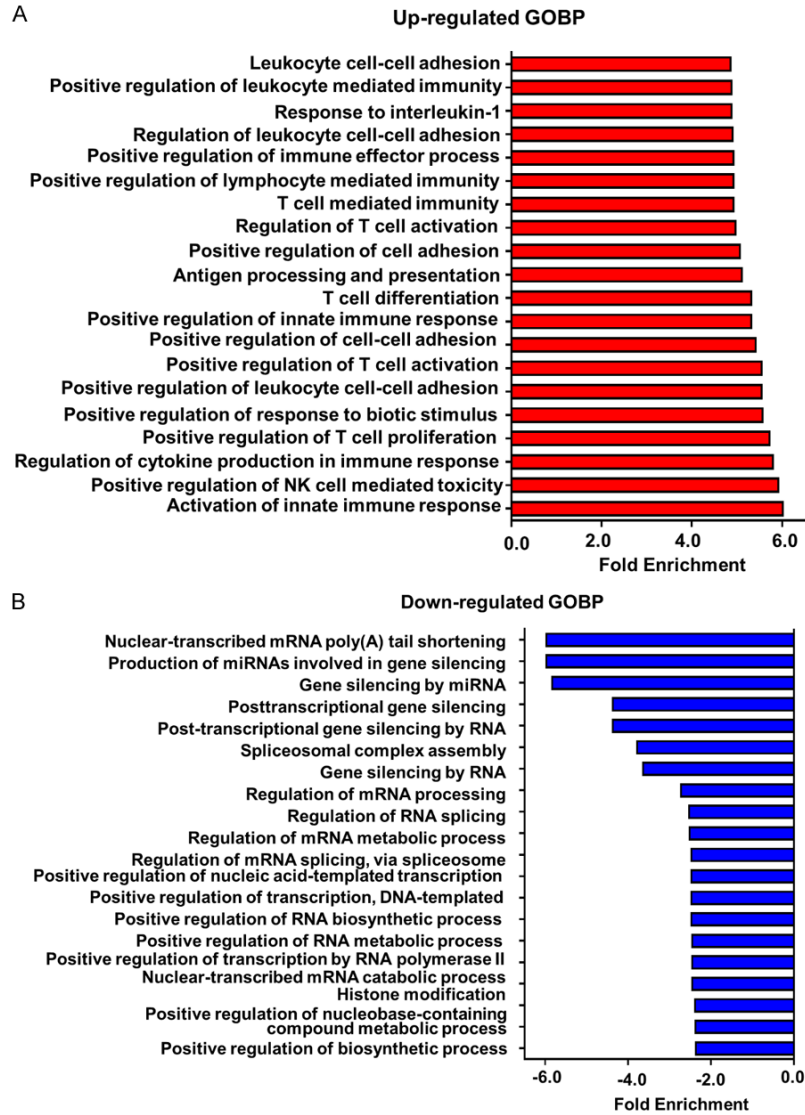

**Supplementary Figure 6.** Comparison of expressed canonical pathways using gene ontology (GO) analysis between the high and low CTSC expression groups. A. Upregulated differentially expressed canonical pathways based on GO analysis. B. Downregulated differentially expressed canonical pathways based on GO analysis.
